# Supplementary material
Source: publisher site journal article supplement (https://www.dovepress.com/article/593180)
Supplement: Supplementary file 1 [file 593180_Supplementary%20Information.docx]

Table S1 Sensitivity Analysis in PP Population for Primary Outcome

|  | Treatment group (n=50) | Control group  (n=49) | Mean difference (estimate 95%CI) | *p* value |
| --- | --- | --- | --- | --- |
| Sufentanil consumption within 48 h postoperatively (μg) | 8.1±5.3 | 32.3±11.8 | -24.1 (-27.8 to -20.5) | <0.001 |

**Notes:** Data are reported as mean ± SD.

Treatment group: ropivacaine plus triamcinolone acetonide group; control group: ropivacaine alone group.
